# Supplementary material for: The microRNA regulatory landscape of MSC-derived exosomes: a systems view
Source: PubMed Central journal article supplement (PMC5780426; doi:10.1038/s41598-018-19581-x), 2018-01-23
Supplement: 41598_2018_19581_MOESM1_ESM.pdf [file 41598_2018_19581_MOESM1_ESM.pdf]

# The microRNA regulatory landscape of MSC-derived exosomes: a systems view

Scott W. Ferguson, Jinli Wang, Christine J. Lee, Maixian Liu, Sriram Neelamegham, John M. Canty, Juliane Nguyen

## Supplementary Information

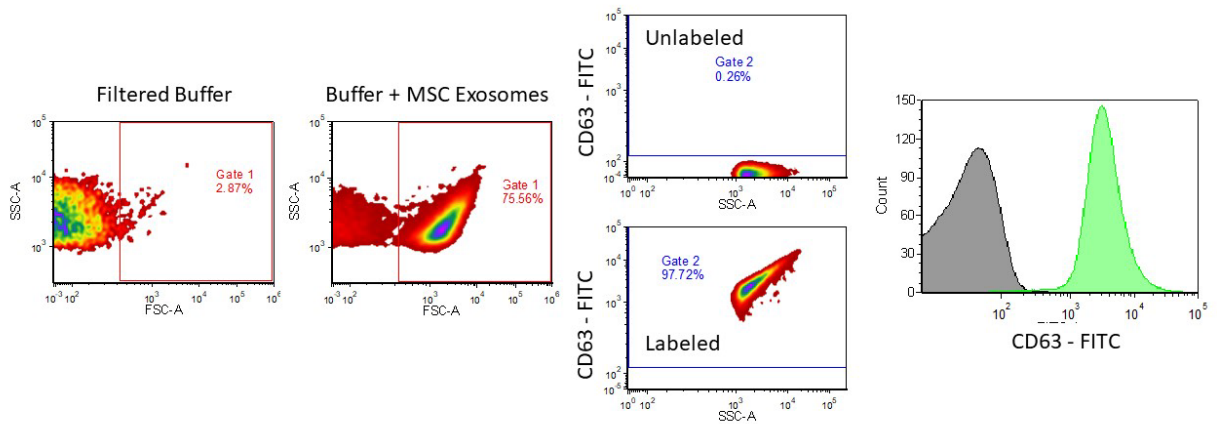

**Supplementary Figure 1:** Analysis of exosomes for CD63 expression by flow cytometry. 50 $\mu$ g MSC exosomes in 100 $\mu$ l of filtered PBS were incubated with 5 $\mu$ l of anti-CD63-FITC antibody (Miltenyi) at 4 $^{\circ}$ C for 1 hour. Samples were analyzed on the MacsQuant flow cytometer using manufacturer suggested settings for exosomes.

**A**

|             | Number of genes targeted | Circulatory System Development | Growth |
|-------------|--------------------------|--------------------------------|--------|
| miR-23a-3p  | 1069                     | 104                            | 176    |
| miR-424-5p  | 956                      | 94                             | 195    |
| miR-144-3p  | 780                      | 85                             | 136    |
| miR-130a-3p | 742                      | 99                             | 180    |
| miR-145-5p  | 660                      | 66                             | 117    |
| miR-29b-3p  | 635                      | 65                             | 129    |
| miR-29a-3p  | 629                      | 65                             | 127    |
| miR-25-3p   | 604                      | 75                             | 120    |
| miR-221-5p  | 456                      | 55                             | 107    |
| miR-21-5p   | 439                      | 61                             | 104    |
| miR-125b-5p | 436                      | 43                             | 93     |
| miR-22-3p   | 422                      | 44                             | 95     |
| miR-199a-3p | 416                      | 53                             | 73     |
| Let-7a-5p   | 174                      | 23                             | 29     |
| Let-7i-5p   | 168                      | 21                             | 28     |
| Let-7b-5p   | 166                      | 22                             | 28     |
| miR-630     | 74                       | 38                             | 66     |
| miR-191-5p  | 72                       | 13                             | 19     |
| miR-1246    | 61                       | 14                             | 8      |
| miR-451a    | 43                       | 10                             | 13     |
| miR-100-5p  | 33                       | 9                              | 6      |

**B**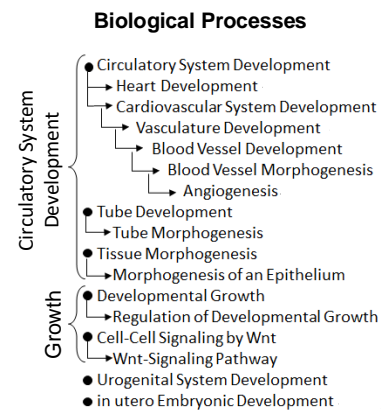**C**

|             | Number of Genes Targeted | GnRH receptor | Angio genesis | Integrin signaling | CCKR Signaling map | Wnt signaling | TGF-beta signaling | PDGF signaling | EGF signaling | PI3K signaling | P53 |
|-------------|--------------------------|---------------|---------------|--------------------|--------------------|---------------|--------------------|----------------|---------------|----------------|-----|
| miR-23a-3p  | 1069                     | 21            | 10            | 12                 | 18                 | 14            | 4                  | 9              | 10            | 5              | 5   |
| miR-424-5p  | 956                      | 28            | 13            | 13                 | 15                 | 16            | 8                  | 12             | 9             | 6              | 3   |
| miR-144-3p  | 780                      | 19            | 6             | 10                 | 9                  | 22            | 5                  | 10             | 9             | 5              | 4   |
| miR-130a-3p | 742                      | 20            | 14            | 8                  | 14                 | 18            | 10                 | 12             | 9             | 3              | 5   |
| miR-145-5p  | 660                      | 16            | 9             | 12                 | 11                 | 10            | 9                  | 10             | 4             | 1              | 0   |
| miR-29b-3p  | 635                      | 11            | 10            | 25                 | 11                 | 15            | 4                  | 5              | 9             | 6              | 6   |
| miR-29a-3p  | 629                      | 11            | 8             | 25                 | 11                 | 15            | 4                  | 6              | 8             | 5              | 6   |
| miR-25-3p   | 604                      | 10            | 3             | 11                 | 10                 | 10            | 5                  | 3              | 4             | 2              | 2   |
| miR-221-5p  | 456                      | 11            | 8             | 5                  | 6                  | 16            | 6                  | 4              | 4             | 1              | 2   |
| miR-21-5p   | 439                      | 10            | 4             | 6                  | 6                  | 5             | 10                 | 5              | 6             | 1              | 0   |
| miR-125b-5p | 436                      | 10            | 4             | 3                  | 9                  | 5             | 2                  | 6              | 7             | 1              | 1   |
| miR-22-3p   | 422                      | 12            | 6             | 2                  | 8                  | 5             | 7                  | 4              | 6             | 4              | 6   |
| miR-199a-3p | 416                      | 13            | 7             | 9                  | 10                 | 9             | 4                  | 3              | 8             | 2              | 0   |
| Let-7a-5p   | 174                      | 3             | 2             | 5                  | 0                  | 3             | 4                  | 2              | 1             | 1              | 1   |
| Let-7i-5p   | 168                      | 3             | 1             | 6                  | 0                  | 3             | 4                  | 3              | 1             | 1              | 1   |
| Let-7b-5p   | 166                      | 3             | 1             | 5                  | 0                  | 3             | 4                  | 3              | 1             | 1              | 1   |
| miR-630     | 74                       | 13            | 6             | 2                  | 7                  | 7             | 4                  | 3              | 4             | 1              | 1   |
| miR-191-5p  | 72                       | 4             | 3             | 2                  | 1                  | 1             | 2                  | 0              | 0             | 0              | 1   |
| miR-1246    | 61                       | 2             | 1             | 0                  | 1                  | 3             | 1                  | 0              | 1             | 0              | 0   |
| miR-451a    | 43                       | 1             | 0             | 0                  | 1                  | 1             | 1                  | 0              | 1             | 0              | 1   |
| miR-100-5p  | 33                       | 1             | 0             | 2                  | 0                  | 2             | 0                  | 0              | 0             | 0              | 0   |

**Supplementary Figure 2.** (A) Number of genes targeted by the top 23 miRNAs found in MSC exosomes categorized into total number of genes targeted, genes related to circulatory system development, and genes related to growth. (B) Biological processes that are categorized into circulatory system development and growth, (C) Number of genes targeted categorized into total number of genes targeted and enriched pathways.

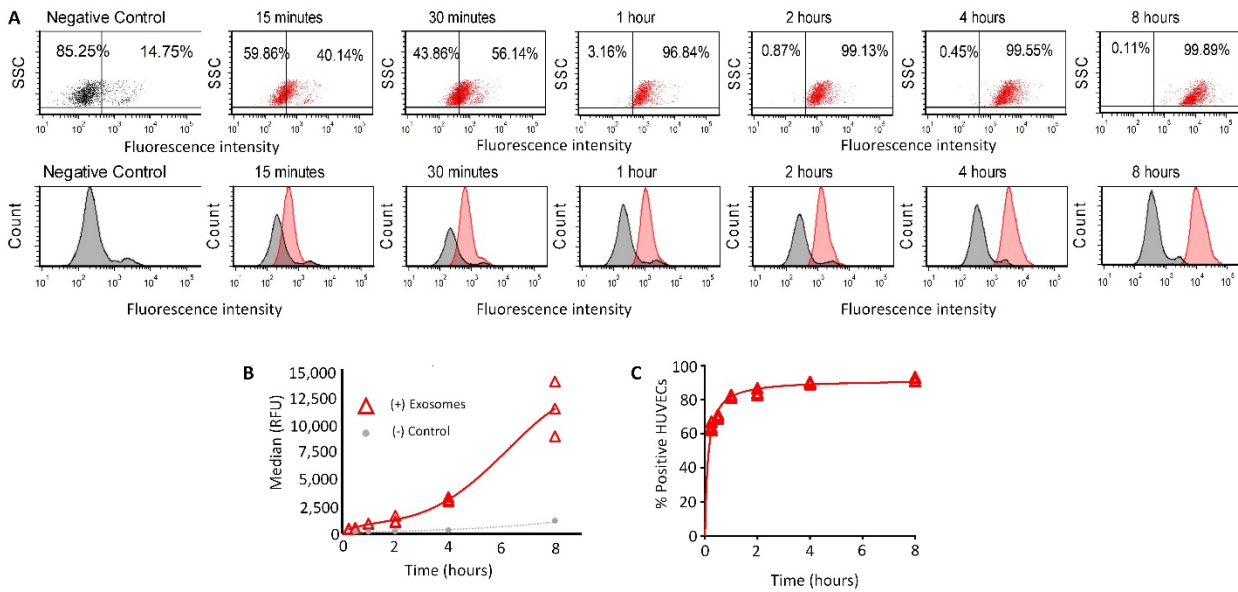

**Supplementary Figure 3.** Cellular binding and uptake of exosomes into HUVECs as a function of time (0.5h, 1h, 2h, 4h, 6h, and 8h).

To assess uptake kinetics of exosomes into endothelial cells, HUVECs were incubated with Bodipy-TR-labeled exosomes for up to eight hours. Exosome uptake increased with increasing incubation time. A 12-fold increase in exosomal binding or uptake was observed at 8 h of incubation compared to 1h and 2h of incubation. At 30 minutes of incubation, only 56% of cells showed exosome binding and or uptake, which increased to ~95% after 1 h and further to 99.1% and 99.9% after 2 to 8 hours of incubation. Further, the percentage of exosome-positive HUVECs increased over time (~1,000 MFI at 1 h vs. ~12,500 MFI at 8 h).

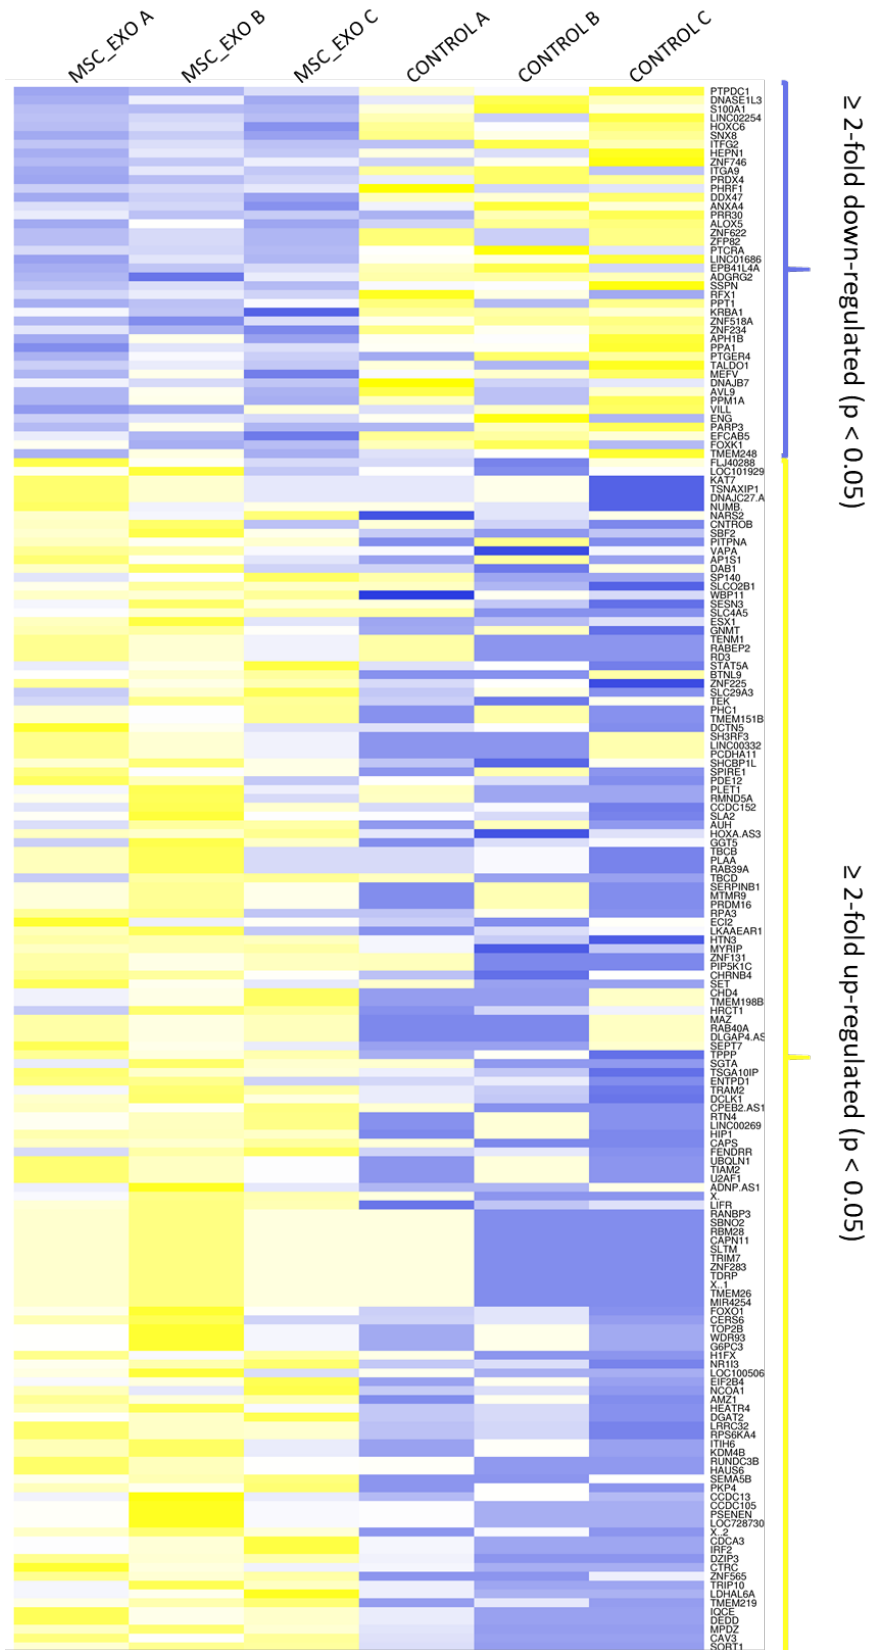

**Supplementary Figure 4.** Heatmap illustrating all genes in HUVECs that were up- or down-regulated ( $\geq 2$ -fold) as a result of exposure to MSC exosomes achieving statistical significance at  $p < 0.05$ . RNA reads were aligned using STAR version 2.5.3a. The resultant SAM files were converted to BAM in Galaxy and then analyzed using htseq-count, followed by DEseq2 which provides fold changes as well as statistical significance.

| Unique Gene Targets of miR-199a-3p | Other Non-Unique Gene Targets of miR-199a-3p |          |         |
|------------------------------------|----------------------------------------------|----------|---------|
| CASP9                              | CRIM1                                        | ERBB4    | NF1     |
| CABLES1                            | NET1                                         | ATRX     | DNMT3A  |
| LKB1                               | GRHL3                                        | PAK1     | CNOT7   |
| NEUROD1                            | PRKACB                                       | MECP2    | CDC42   |
| RB1                                | GREM1                                        | CDC14A   | ITGA6   |
| DEPDC1B                            | NR4A3                                        | ARHGEF12 | VANGL1  |
| KIAA0141                           | MAP3K1                                       | DCBLD2   | PIK3R1  |
| ITGA3                              | ANGPT1                                       | UFM1     | PTPN3   |
| MAP3K5                             | PRKCE                                        | YWHAE    | PTPRJ   |
| CHMP5                              | CITED2                                       | SEMA3A   | YAP1    |
| ARHGEF2                            | GPR37                                        | MEIS2    | AREL1   |
| SLC46A2                            | DDIT4                                        | SH3GLB1  | PTPRU   |
| PRPF40A                            | NTRK2                                        | MAPRE1   | SGK3    |
| SERPINE2                           | PLCB1                                        | RARB     | TAOK1   |
| DLX5                               | FOS                                          | RUNX1    | GOLGA4  |
| ARG2                               | CXCL12                                       | FN1      | TRIM36  |
| ATP6V1C2                           | CPEB4                                        | GDF9     | CYP1B1  |
| SRA1                               | MAP3K4                                       | CARD6    | BCL2L14 |
| PAK4                               | FBXW11                                       | CHL1     |         |
| CELSR2                             | UBQLN1                                       | PDE8A    |         |
| USP8                               | SLC39A10                                     | PAWR     |         |
| HGF                                | HNF1B                                        | ARHGEF3  |         |

**Supplementary Table 3:** Gene targets of the miRNAs were compared to the GO Terms: Regulation of Cell Death (GO:0010941), Growth (GO:0040007), Cell Cycle (GO:0051726) and Wnt-signaling Pathway (GO:0016055). Twenty two genes curated in regulation of cell death, growth, cell cycle, or Wnt-signaling pathway were unique to miR-199a-3p.

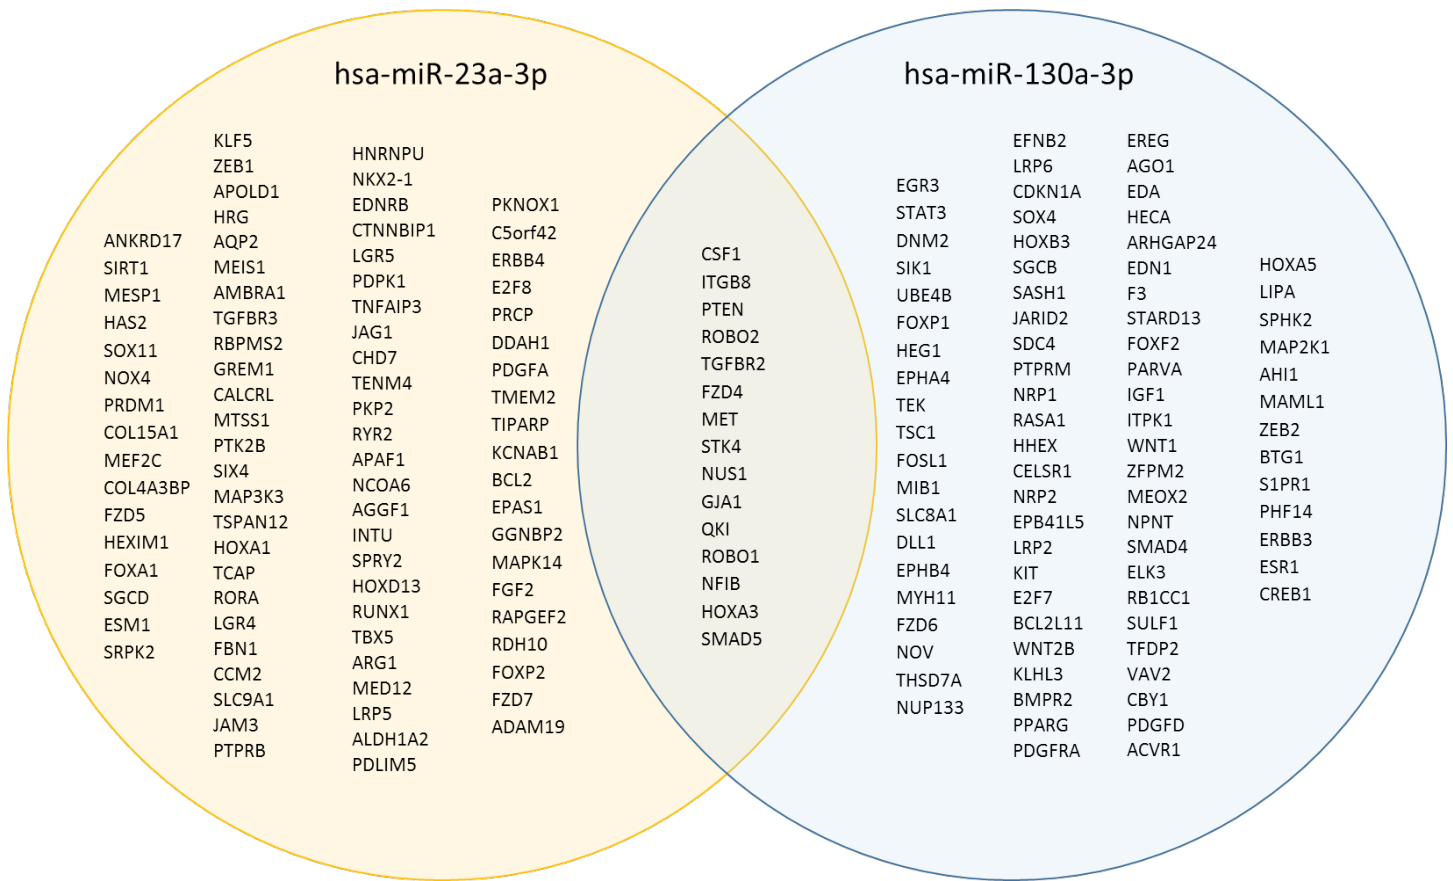

**Supplementary Figure 5.** The Venn diagram depicts the 104 and 99 genes related to “Circulatory System Development” (Supplementary Figure 2A) for hsa-miR-23a-3p and hsa-miR-130a-3p.

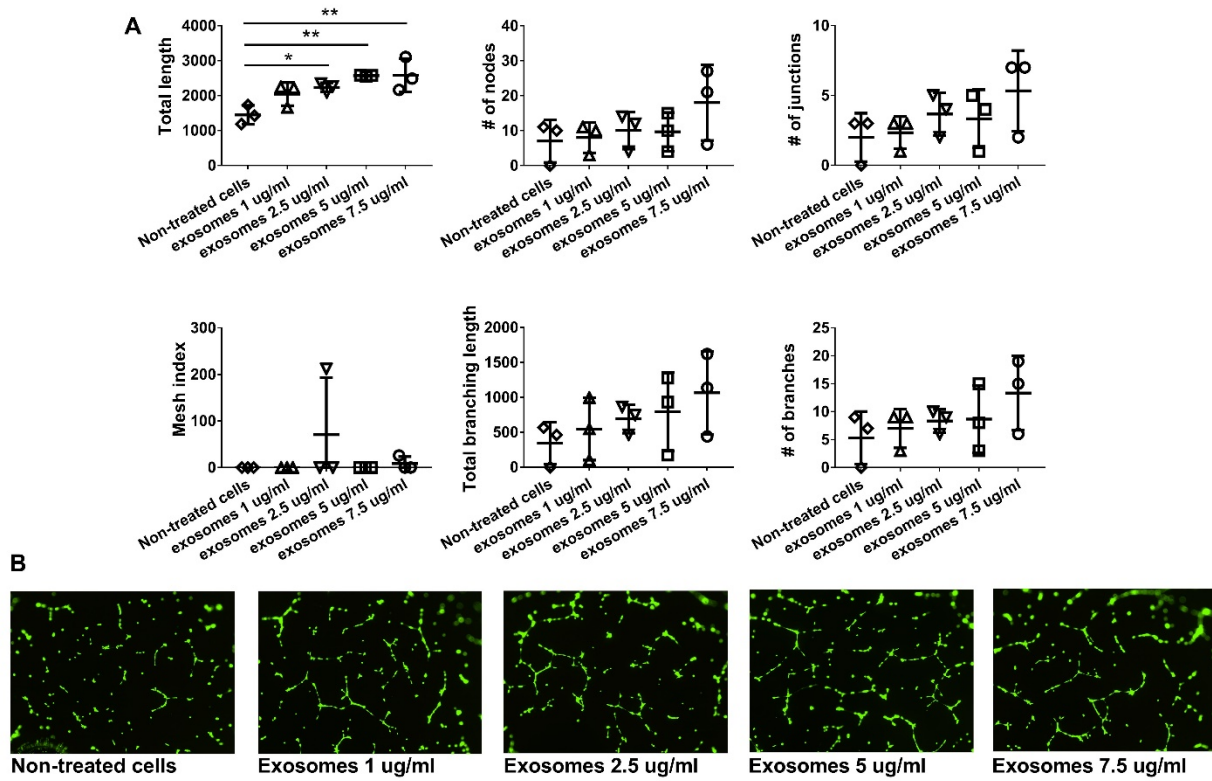

**Supplementary Figure 6.** (A) Effect of unmodified MSC exosomes on angiogenesis in HUVECs as analyzed using the ImageJ angiogenesis analyzer. (B) Calcein stained HUVECs treated with increasing concentrations of exosomes. Data are mean  $\pm$  sd, n=3, by one-way ANOVA with Tukey post-test (\* $p$ <0.05, \*\* $p$ <0.01).
